# Supplementary material for: Enhanced cytotoxicity of benzimidazole carbamate derivatives and solubilisation by encapsulation in cucurbit[n]uril
Source: Royal Society of Chemistry journal article supplement (doi:10.1039/c003732j), 2010-01-01
Supplement: c003732j-3.pdf [file c003732j-3.pdf]

## Supplementary Information

### Enhanced cytotoxicity of benzimidazole carbamate derivatives and solubilisation by encapsulation in cucurbit[*n*]uril

Yunjie Zhao<sup>a,c</sup>, Mohammad H. Pourgholami<sup>b</sup>, David L. Morris<sup>b</sup>,

J. Grant Collins<sup>a\*</sup> and Anthony I. Day<sup>a\*</sup>

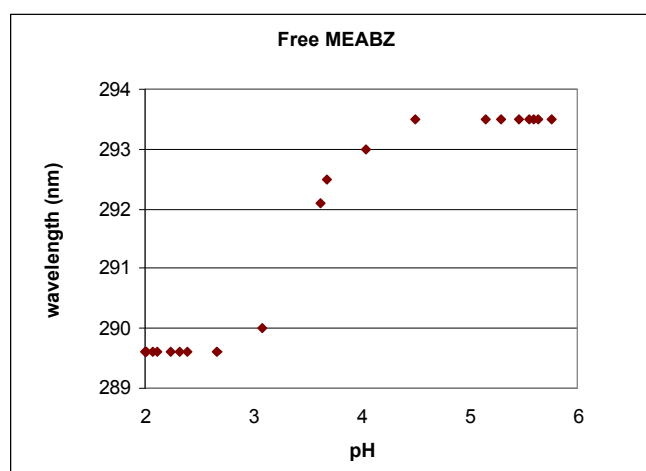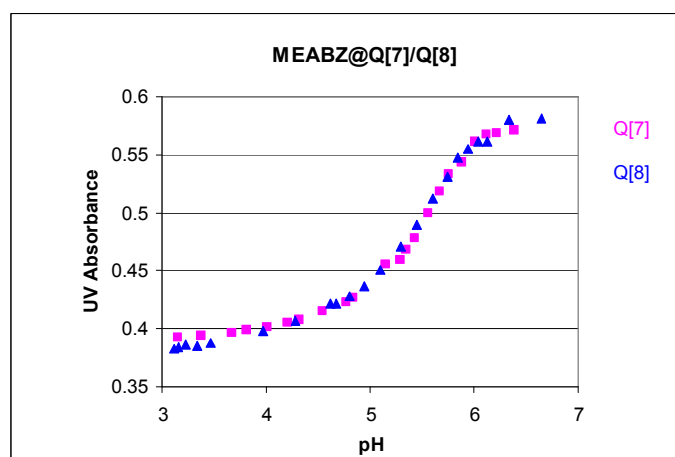

### Supplementary Information Figure 3

Determination of the pKa of free and Q[7]- and Q[8]-bound MEABZ. The plots show the effect on the UV spectrum as the pH was incrementally increased.
