# Supplementary material for: Enhanced cytotoxicity of benzimidazole carbamate derivatives and solubilisation by encapsulation in cucurbit[n]uril
Source: Royal Society of Chemistry journal article supplement (doi:10.1039/c003732j), 2010-01-01
Supplement: c003732j-4.pdf [file c003732j-4.pdf]

## Supplementary Information

### Enhanced cytotoxicity of benzimidazole carbamate derivatives and solubilisation by encapsulation in cucurbit[*n*]uril

Yunjie Zhao<sup>a,c</sup>, Mohammad H. Pourgholami<sup>b</sup>, David L. Morris<sup>b</sup>,  
J. Grant Collins<sup>a\*</sup> and Anthony I. Day<sup>a\*</sup>

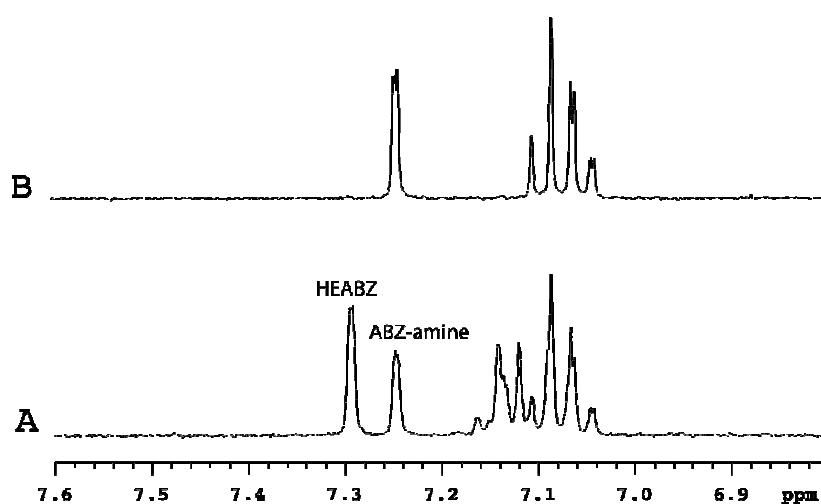

#### Supplementary Information Figure 4

An example of the product distribution of HEABZ and ABZ-amine that occurs in the synthesis of HEABZ. The figure shows the aromatic region of the <sup>1</sup>H NMR spectrum (in CD<sub>3</sub>OD) of a reaction of ABZ with ethanediol (A) and a spectrum of pure ABZ-amine (B). The respective H4 protons of HEABZ and ABZ-amine are indicated in spectrum A. In this reaction, the crude product contained 50% HEABZ.
