# Supplementary material for: Enhanced cytotoxicity of benzimidazole carbamate derivatives and solubilisation by encapsulation in cucurbit[n]uril
Source: Royal Society of Chemistry journal article supplement (doi:10.1039/c003732j), 2010-01-01
Supplement: c003732j-5.pdf [file c003732j-5.pdf]

## Supplementary Information

### Enhanced cytotoxicity of benzimidazole carbamate derivatives and solubilisation by encapsulation in cucurbit[*n*]uril

Yunjie Zhao<sup>a,c</sup>, Mohammad H. Pourgholami<sup>b</sup>, David L. Morris<sup>b</sup>,  
J. Grant Collins<sup>a\*</sup> and Anthony I. Day<sup>a\*</sup>

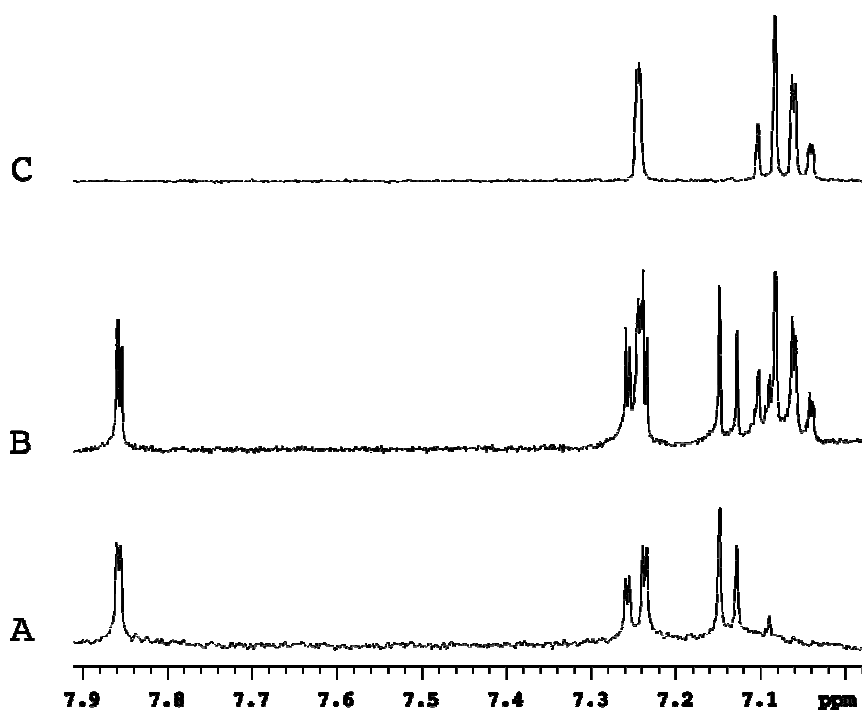

#### Supplementary Information Figure 5

The figure shows the solvolysis reaction of the MEABZ isomer B with methanol to slowly form ABZ-amine. The figure shows the aromatic region of the <sup>1</sup>H NMR spectrum of MEABZ isomer B freshly dissolved in CD<sub>3</sub>OD (A), the same sample after standing for 3 days (B) and ABZ-amine (C).
